# Supplementary material
Source: MDPI journal article supplement (https://www.mdpi.com/2306-5729/7/4/43)
Supplement: s1 [file s1]

## Supplementary Material S2: Copy of questionnaire provided to the farmers of veal calves

### Farmers' questionnaire

Date of farmer interview \_\_\_\_\_

#### **FARM DETAILS:**

Farm denomination: \_\_\_\_\_

Farm identification code: \_\_\_\_\_ Address: \_\_\_\_\_

#### **BATCH INFORMATION:**

Batch identification number at slaughter: \_\_\_\_\_

No. of animals monitored at slaughter \_\_\_\_\_ with a total of No. animals \_\_\_\_\_ slaughtered the same day

Fattening days: \_\_\_\_\_

#### **BARN CHARACTERISTICS:**

|                            | multiple choice or unit  | barn type 1 | barn type 2 |
|----------------------------|--------------------------|-------------|-------------|
| <b>BARN AND PEN</b>        |                          |             |             |
| pen dimensions             | m <sup>2</sup>           |             |             |
| animals/pen                | No.                      |             |             |
| drinkers/pen               | No.                      |             |             |
| <b>FLOORING SYSTEM</b>     |                          |             |             |
| • slatted floor:           |                          |             |             |
| type of slot openings      | fully-slatted/perforated |             |             |
| material                   | concrete/wood            |             |             |
| • rubber mats              |                          |             |             |
| on top of the slats        | yes/no                   |             |             |
| on the whole floor         | yes/no                   |             |             |
| only in part               | yes/no                   |             |             |
| <b>MANAGEMENT DEVICES</b>  |                          |             |             |
| ventilation system         | yes/no                   |             |             |
| type of ventilation system |                          |             |             |

#### **HEALTH STATUS of the batch of animals monitored at slaughter:**

Emergency slaughters/batch No. of animals \_\_\_\_\_

Mortality/batch No. of animals \_\_\_\_\_

**FEEDING SYSTEM adopted for the batch of animals monitored at slaughter:**

---

Liquid milk-replacer diet:

- % of skimmed milk powder % \_\_\_\_\_
- Quantity of milk-replacer kg/calf/cycle \_\_\_\_\_
- Distribution method individual bucket/collective trough
- Frequency of meals No./week

Solid feed diet:

- % of corn grain % \_\_\_\_\_
  - Quantity of solid feed kg/calf/cycle \_\_\_\_\_
  - Distribution method manual/automatic
  - Frequency of meals No./week
  - Time of distribution after milk-replacer meal min \_\_\_\_\_
-
