# Supplementary material
Source: MDPI journal article supplement (https://www.mdpi.com/2306-5729/7/4/43)
Supplement: s1 [file s1]

**Supplementary Material S1: Copy of questionnaire provided to the farmers of finishing  
beef cattle**

**Farmers' questionnaire**

Date of farm visit \_\_\_\_\_

**FARM DETAILS:**

Farm denomination: \_\_\_\_\_

Farm identification code: \_\_\_\_\_ Address: \_\_\_\_\_

**BATCH INFORMATION:**

Batch identification number at slaughter: \_\_\_\_\_

No. of animals monitored at slaughter \_\_\_\_\_ with a total of No. animals \_\_\_\_\_ slaughtered  
the same day

Date of arrival to the farm of the batch of animals monitored at slaughter \_\_\_\_\_

**BARN CHARACTERISTICS:**

|                                 | multiple choice or unit    | barn type 1 | barn type 2 |
|---------------------------------|----------------------------|-------------|-------------|
| <b>BARN AND PEN</b>             |                            |             |             |
| barn structure                  | open/close <sup>1</sup>    |             |             |
| flooring system                 | deep litter/concrete floor |             |             |
| pen dimensions                  | m <sup>2</sup>             |             |             |
| pen length                      | m                          |             |             |
| pen manger                      | m                          |             |             |
| animals/pen                     | No.                        |             |             |
| manger space/animal             | cm/animal                  |             |             |
| drinkers/pen                    | No.                        |             |             |
| <b>FLOORING SYSTEM</b>          |                            |             |             |
| • deep litter:                  |                            |             |             |
| Materials                       |                            |             |             |
| renewal frequency               | No./week                   |             |             |
| Litter change frequency         | No./month                  |             |             |
| • slatted floor:                |                            |             |             |
| type of slot openings           | fully-slatted/perforated   |             |             |
| rubber mats on top of the slats | yes/no                     |             |             |
| <b>MANAGEMENT DEVICES</b>       |                            |             |             |
| movement alleys                 | yes/no                     |             |             |
| ventilation system              | yes/no                     |             |             |
| type of ventilation system      |                            |             |             |

<sup>1</sup>open: one lateral side of the barn completely opened or barn closed with large openings in both lateral sides;  
close: barn closed with small/medium openings in both lateral sides.

**HEALTH STATUS of the batch of animals monitored at slaughter:**

---

|                                          |                      |
|------------------------------------------|----------------------|
| Emergency slaughters/batch               | No. of animals _____ |
| Mortality/batch                          | No. of animals _____ |
| Treatment for lameness/batch             | No. of animals _____ |
| Treatment for respiratory diseases/batch | No. of animals _____ |

---

**OTHER INFORMATION:**

---

|                                                             |                |
|-------------------------------------------------------------|----------------|
| Involvement of a practitioner in charge of cattle nutrition | yes/no         |
| Dietary chemical analysis                                   | yes/no         |
| Frequency of dietary chemical analyses                      | No./year _____ |
| Type of dietary analysis                                    | _____          |
| Silage chemical analysis                                    | yes/no         |
| Frequency of silage chemical analyses                       | No./year _____ |
| Type of silage analysis                                     | _____          |

---
